# Supplementary material for: Neutrophil extracellular traps: Is immunity the second function of chromatin?
Source: PubMed Central journal article supplement — J Cell Biol. 2012 Sep 3;198(5):773–83. doi: 10.1083/jcb.201203170 (PMC3432757; doi:10.1083/jcb.201203170), 2012-09-03
Supplement: supp_jcb.201203170_JCB_201203170_sm.pdf [file supp_jcb.201203170_JCB_201203170_sm.pdf]

Brinkmann and Zychlinsky, <http://www.jcb.org/cgi/content/full/jcb.201203170/DC1>

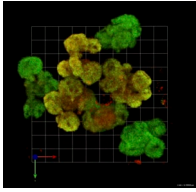

Video 1. **Unfixed hydrated NETs have a cloud-like appearance and occupy a space that is 10–15-fold larger than the cells they originate from.** Staining with antibody fragments against NE (green) and chromatin (red).

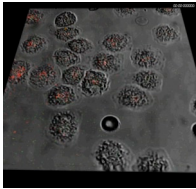

Video 2. **Time-lapse recording of neutrophils undergoing NETosis.** Neutrophils were stimulated with PMA, and a z stack was generated for 2 h and 25 min on a confocal microscope. Directly labeled antibody fragments against NE (green) and chromatin (red) in the supernatant depict formation of NETs in the final phase.
